# Supplementary material
Source: JCI journal article supplement (doi:10.1172/jci194304)

Figure 2G

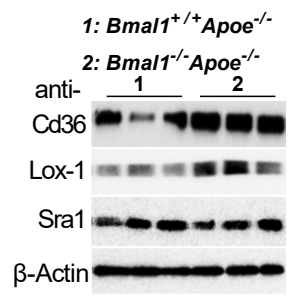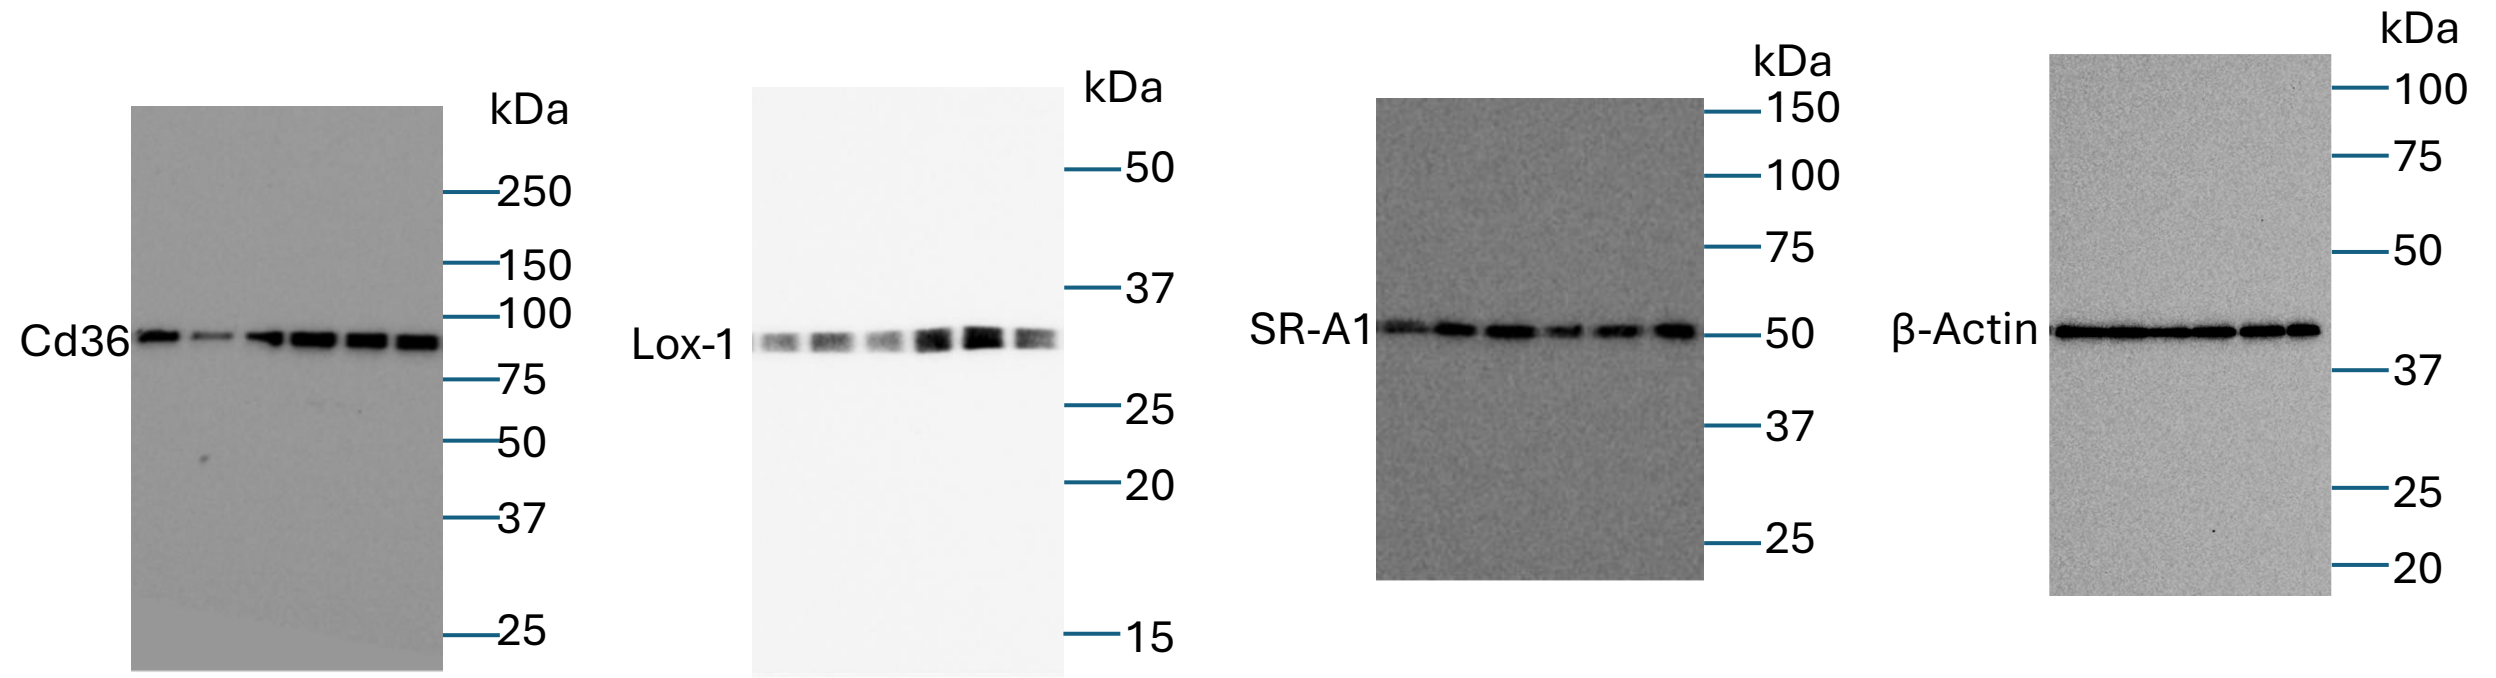

Figure 2G continued

1: *Bmal1*<sup>+/+</sup>*ApoE*<sup>-/-</sup> → *ApoE*<sup>-/-</sup>

2: *Bmal1*<sup>-/-</sup>*ApoE*<sup>-/-</sup> → *ApoE*<sup>-/-</sup>

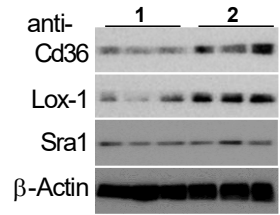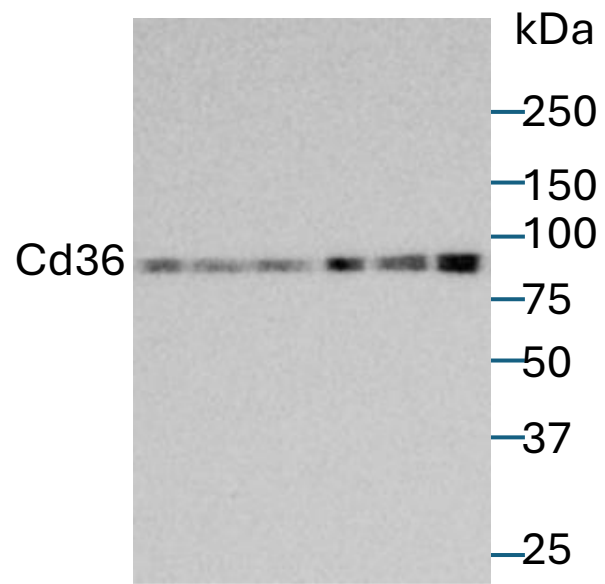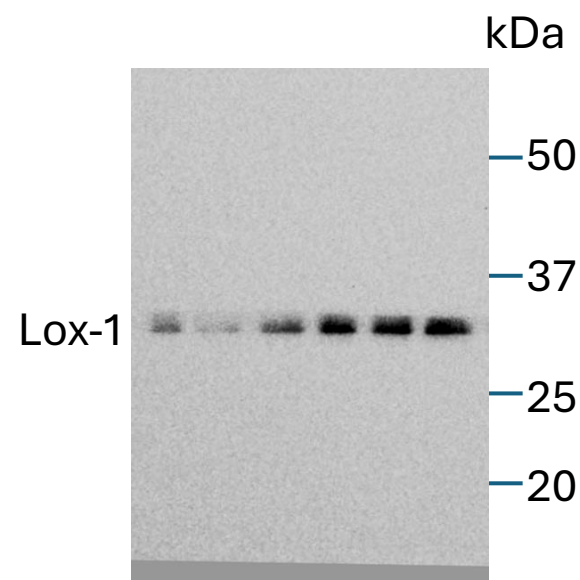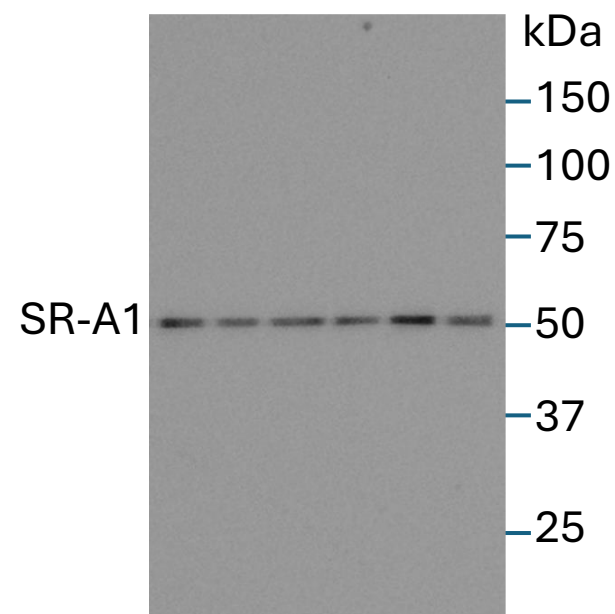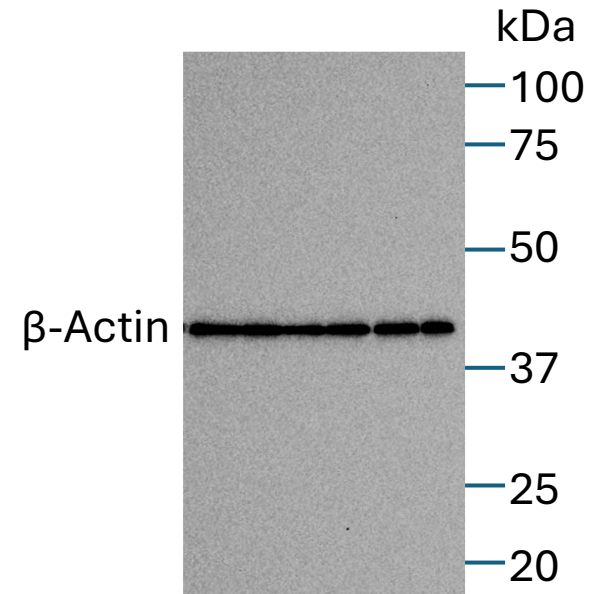

Figure 2H

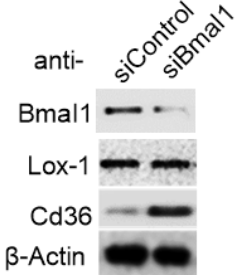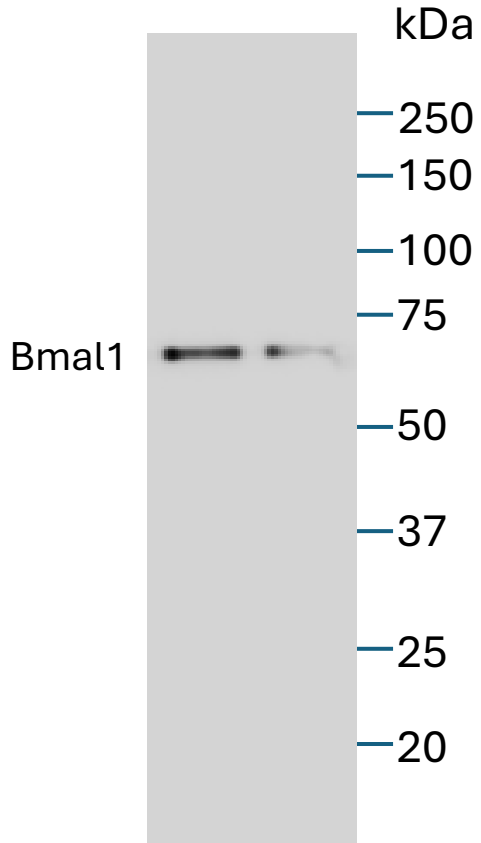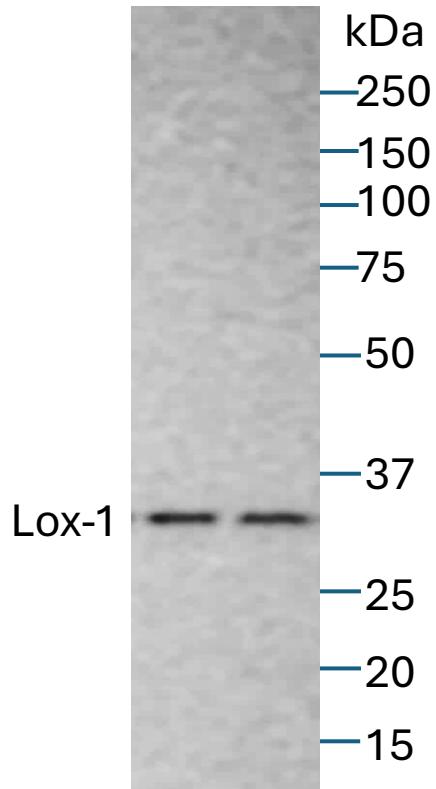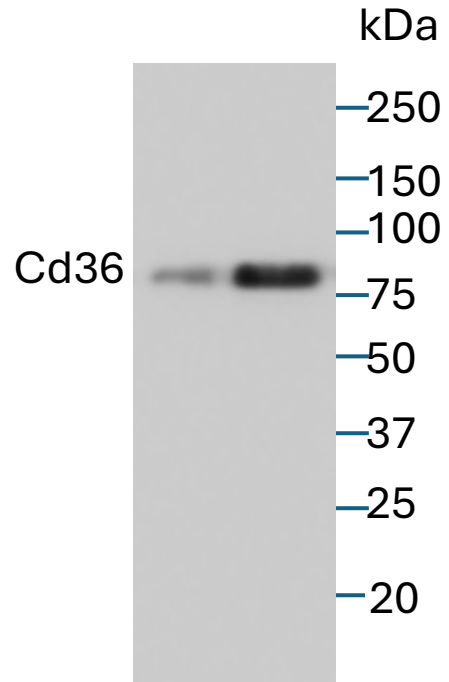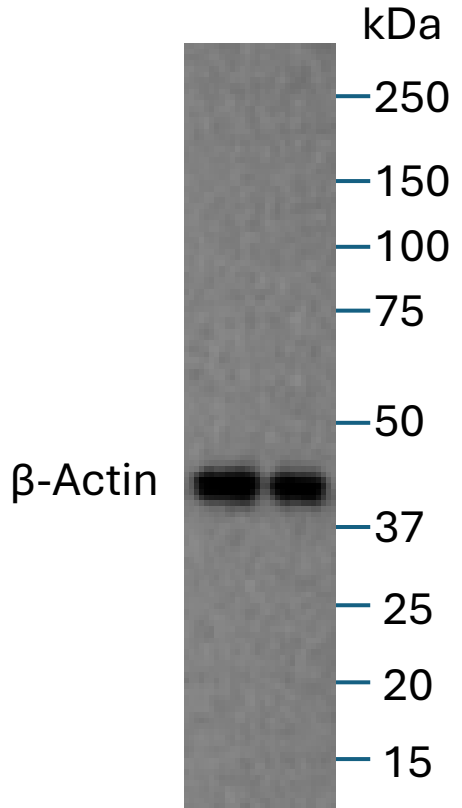

Figure 2L

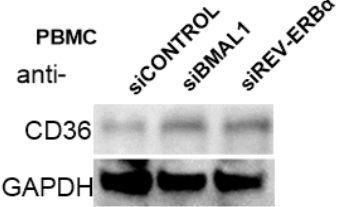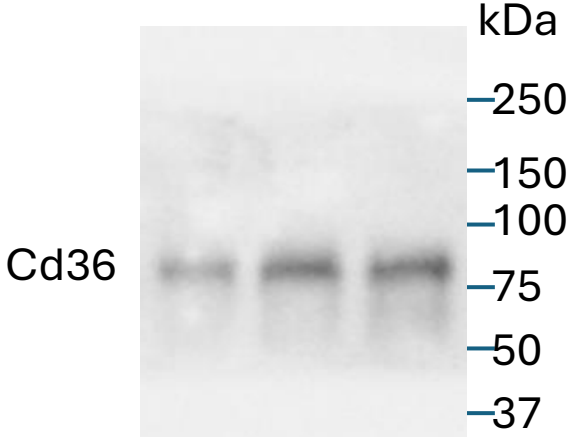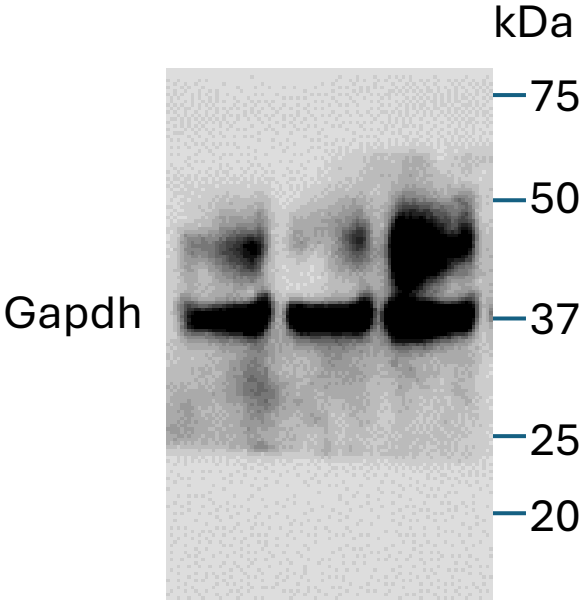

Figure 3E

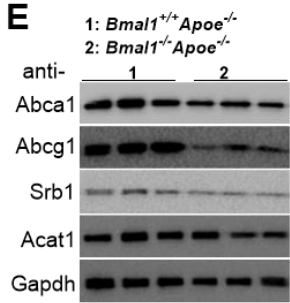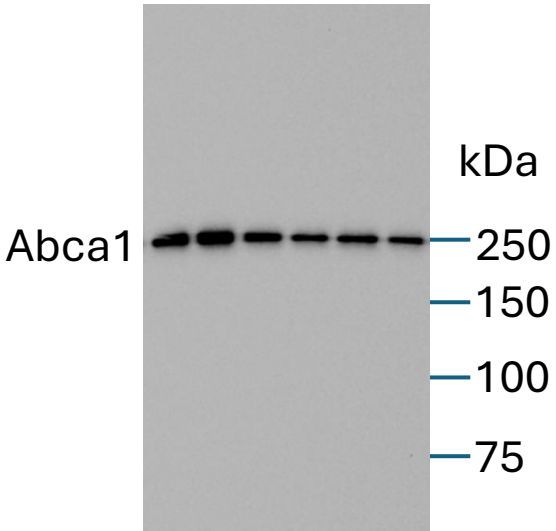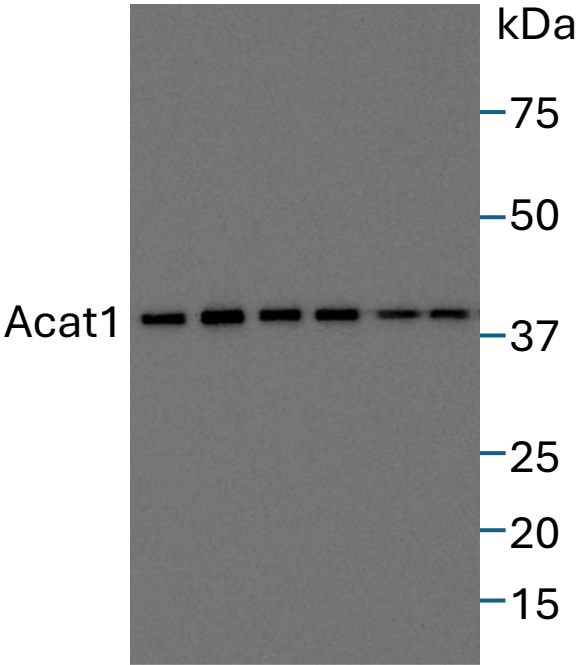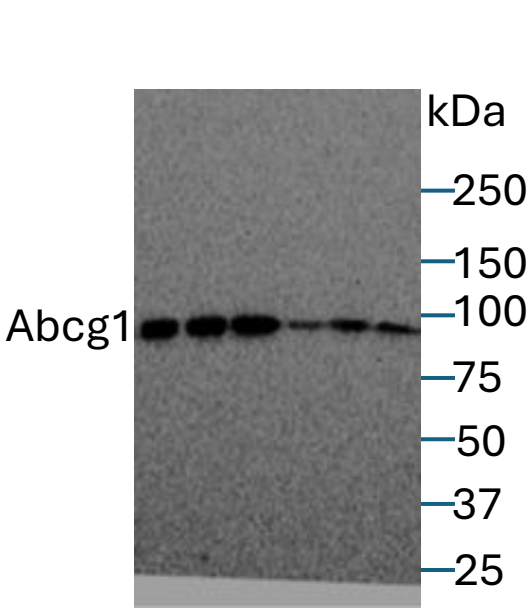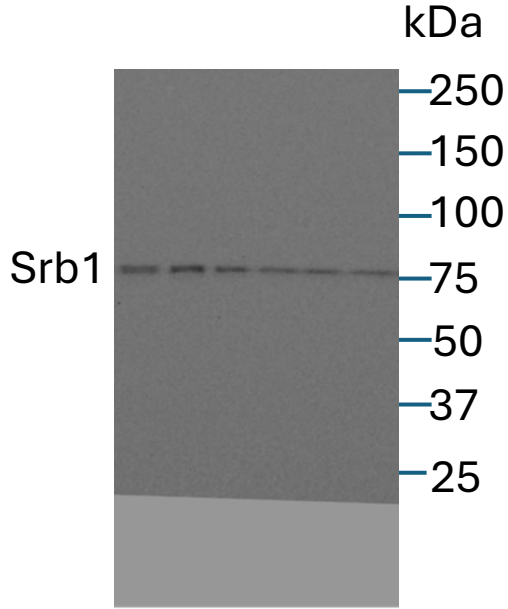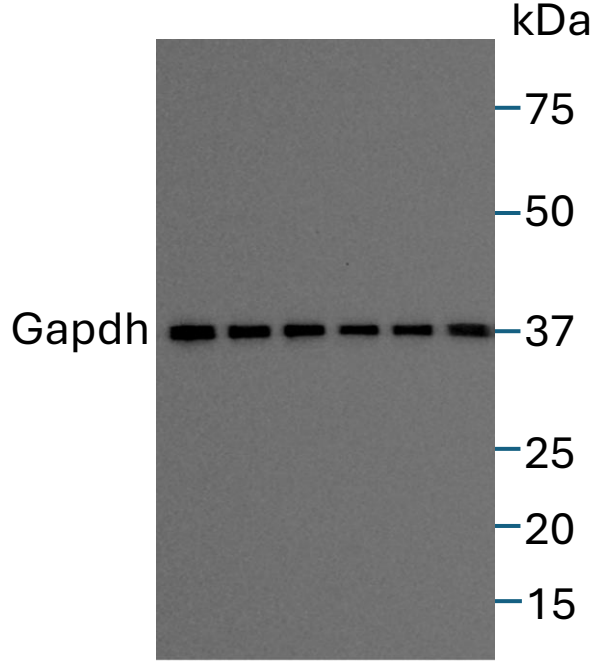

Figure 3E continued

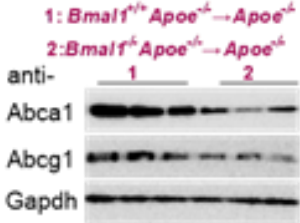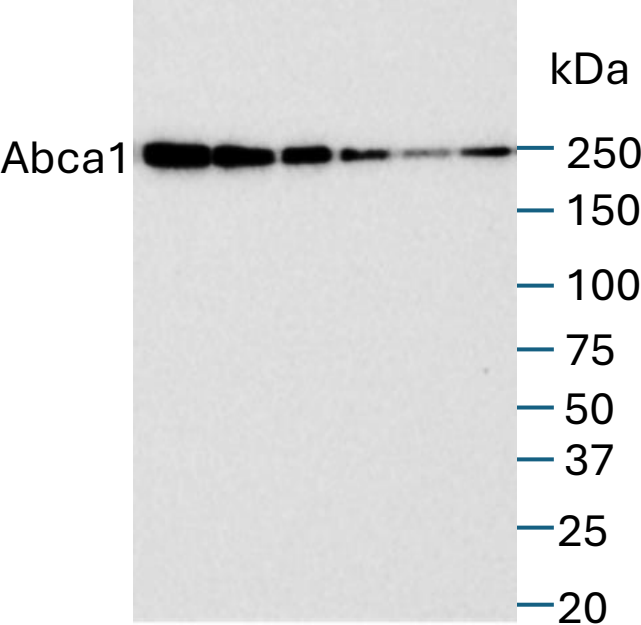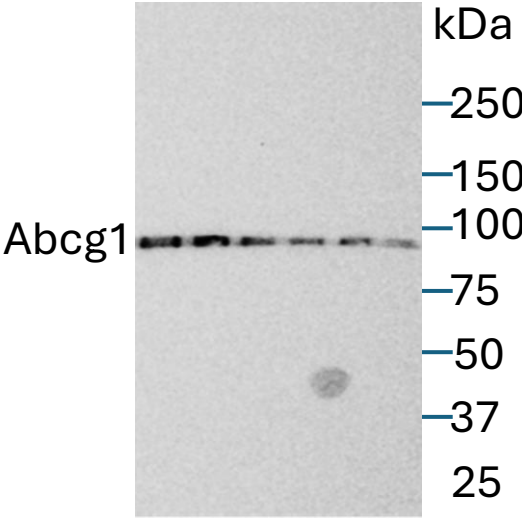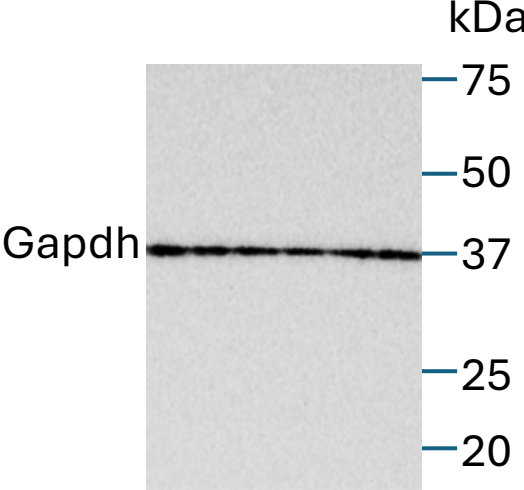

Figure 3E continued

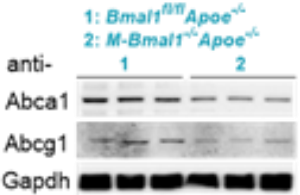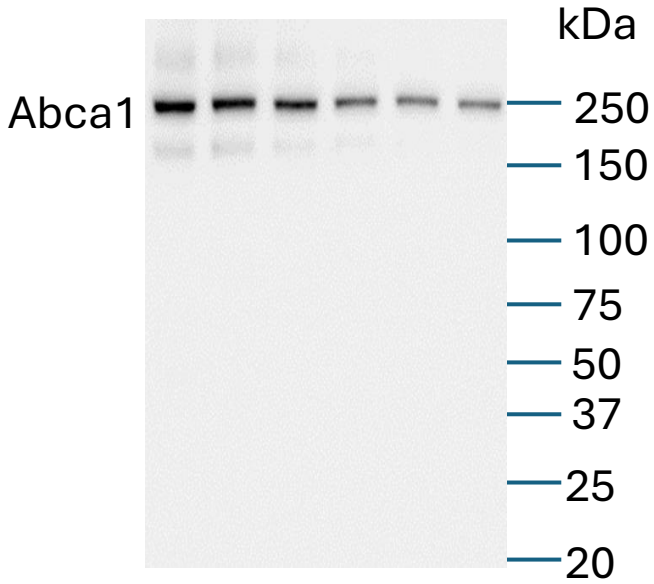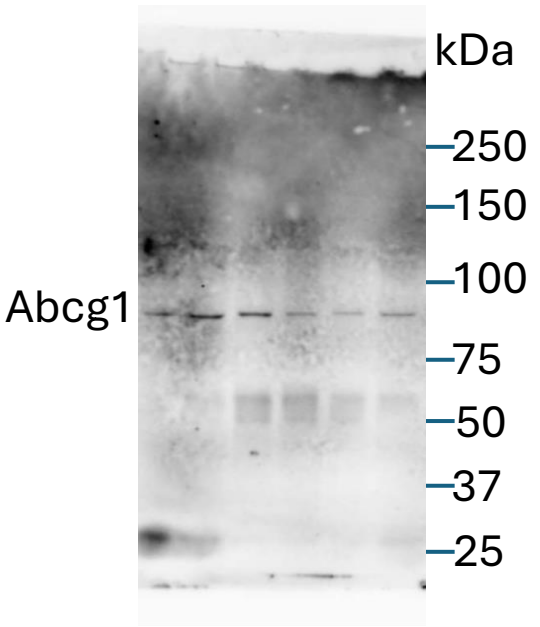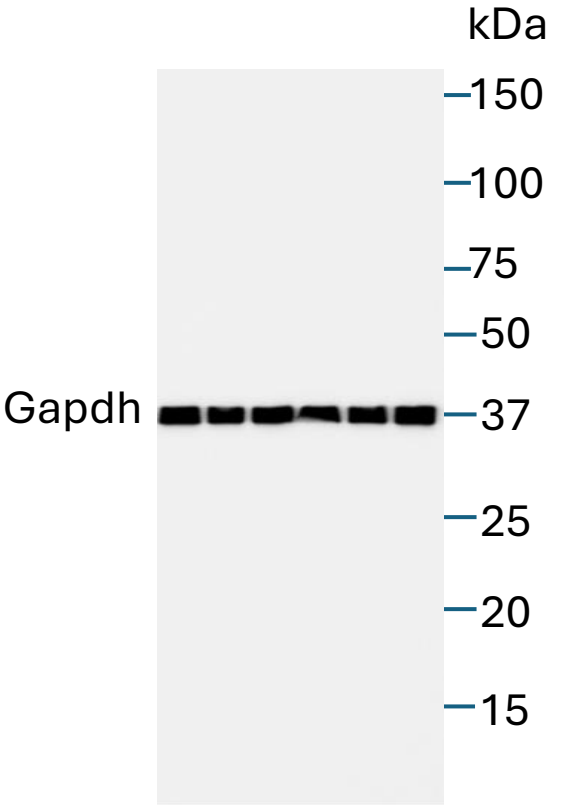

Figure 4B

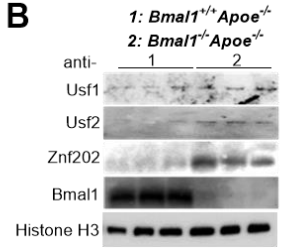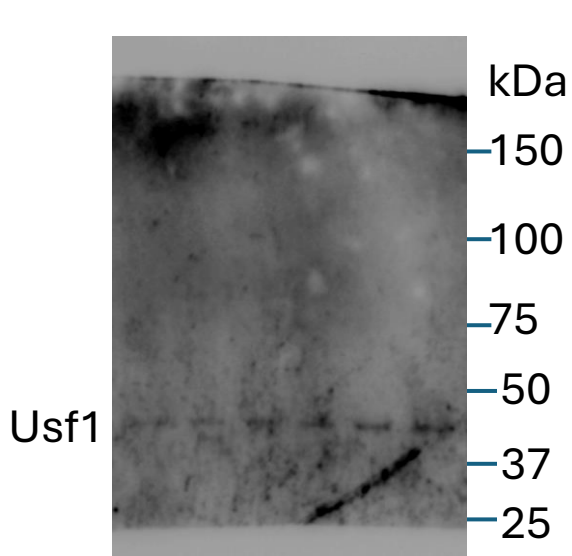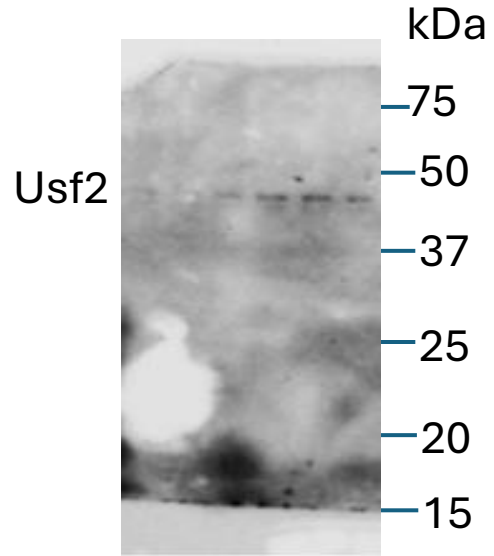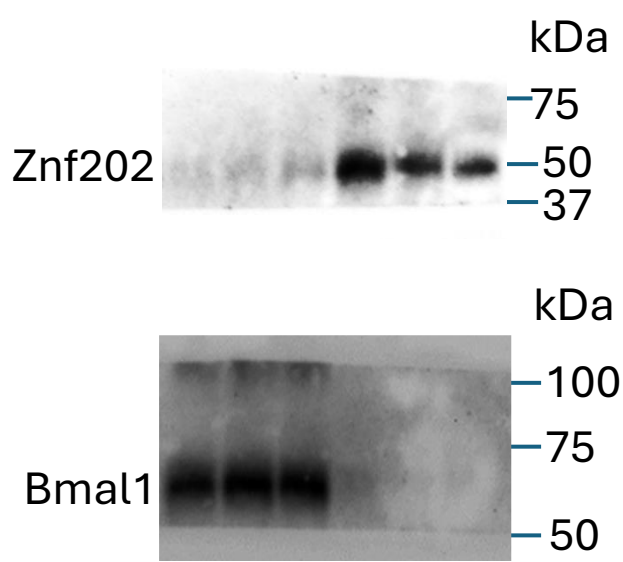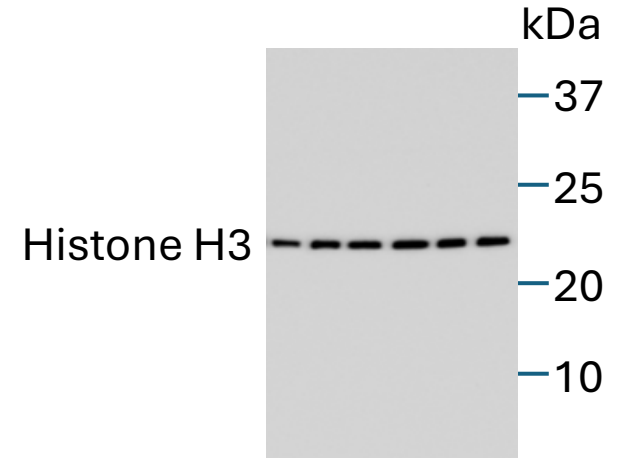

Figure 4B continued

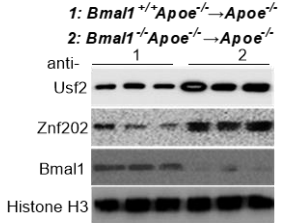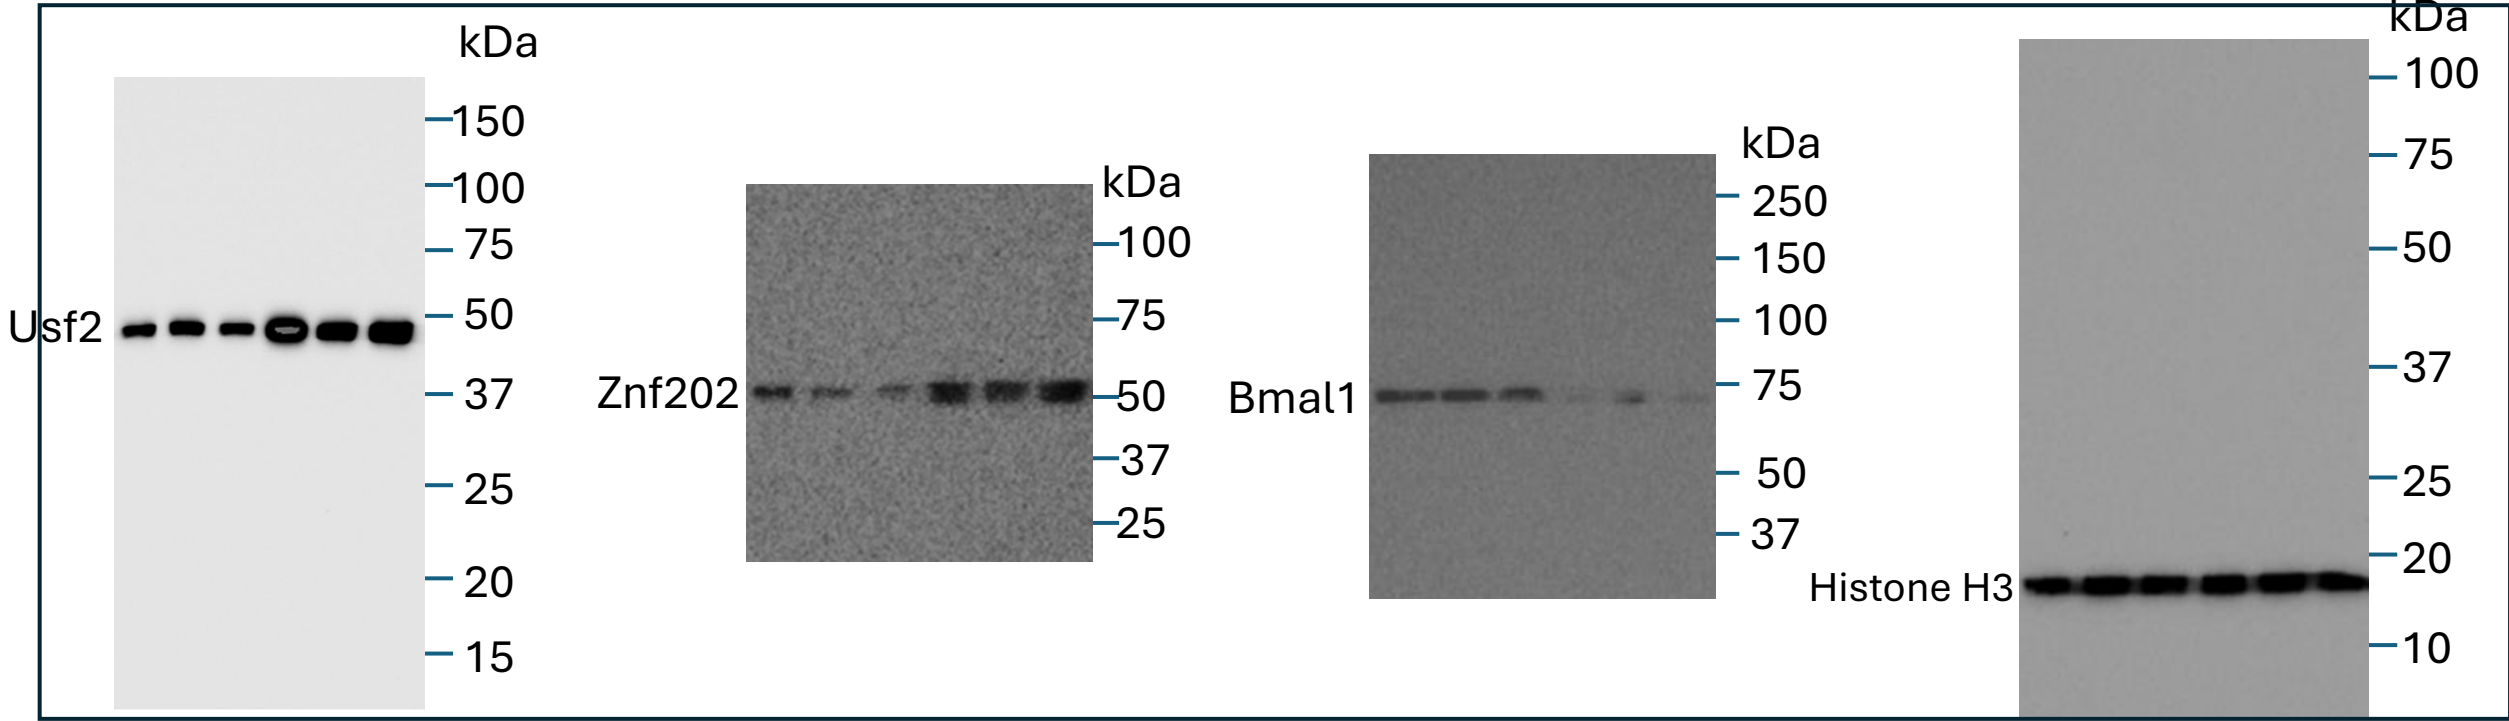

Figure 4B continued

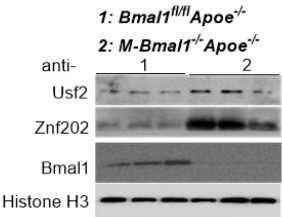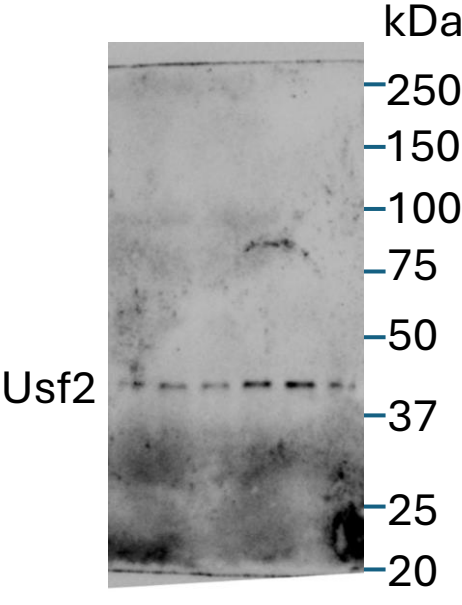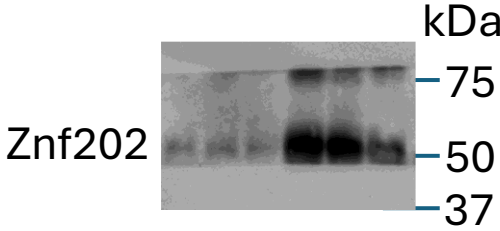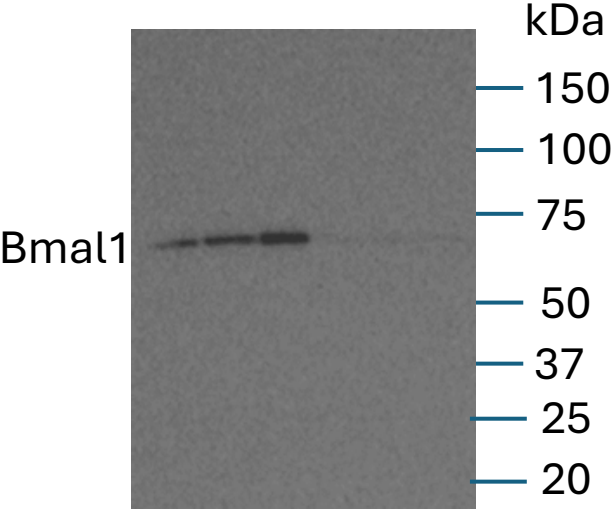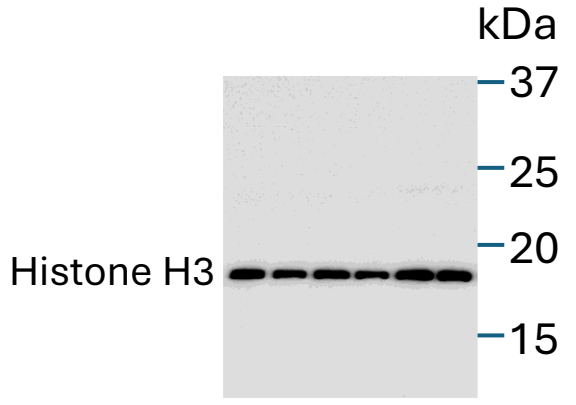

Figure 5C

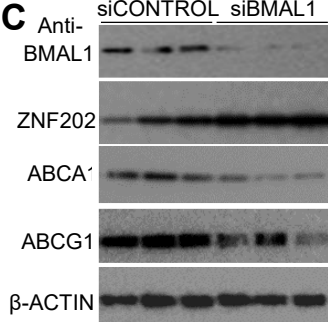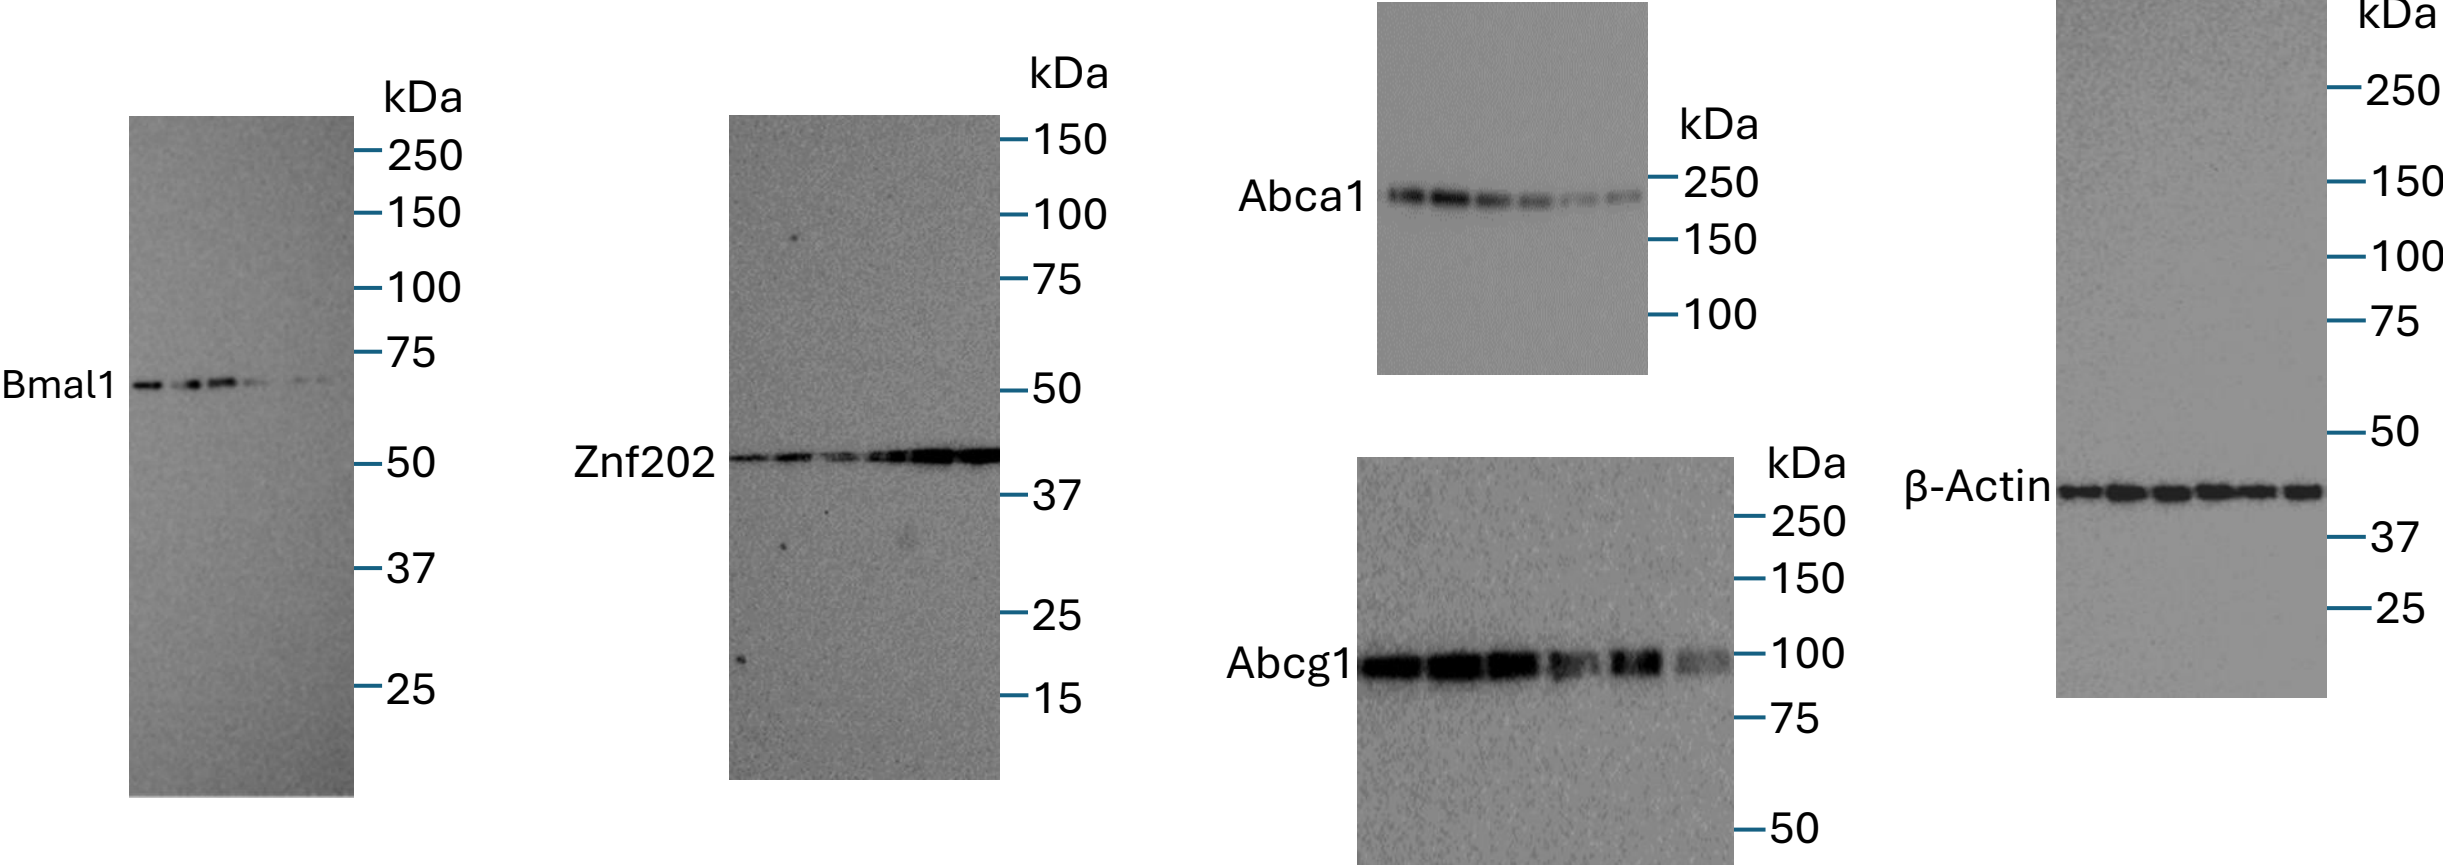

Figure 6G

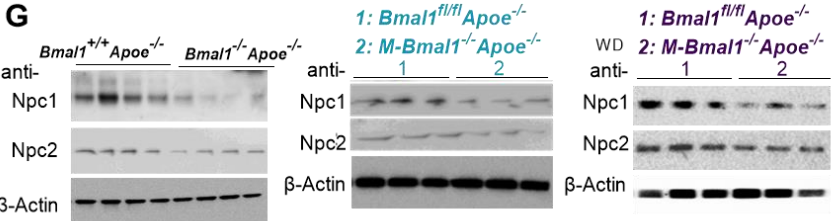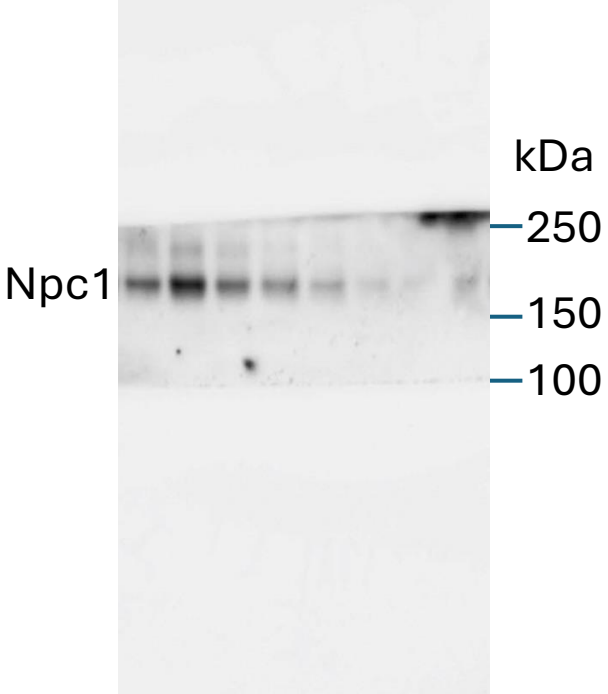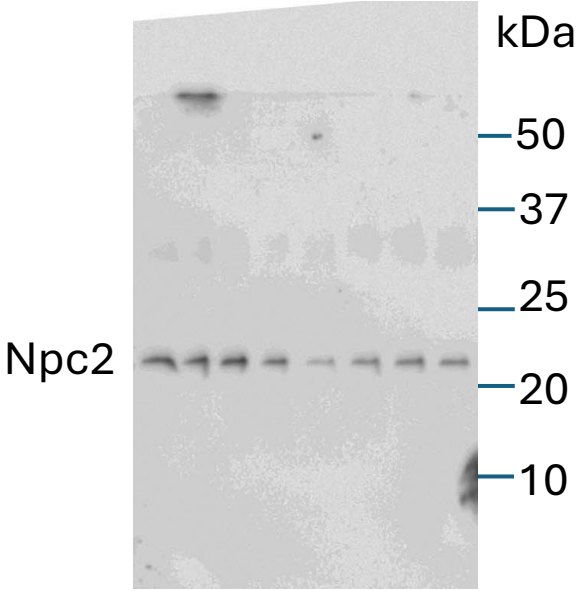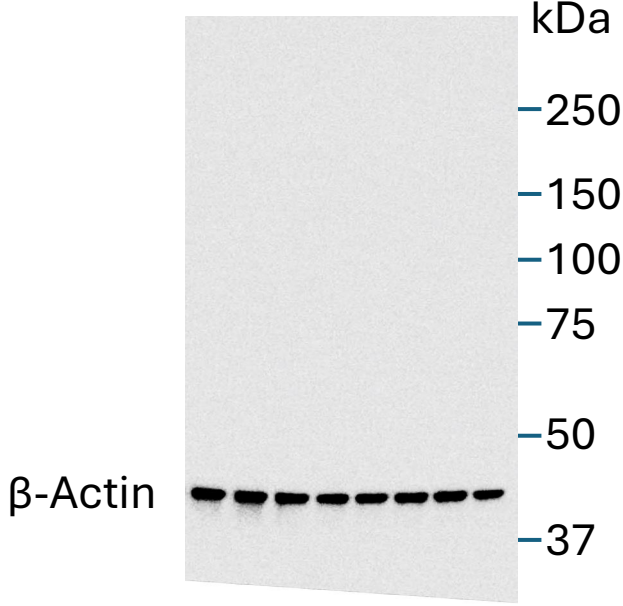

Figure 6G continued

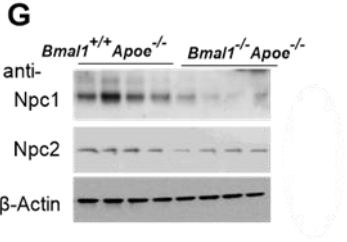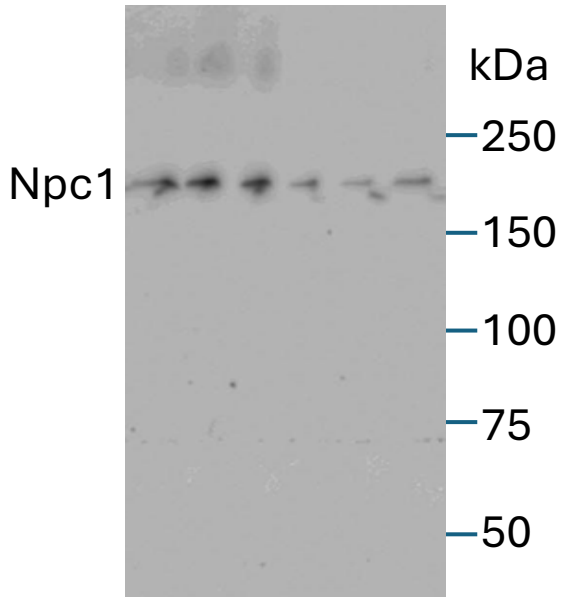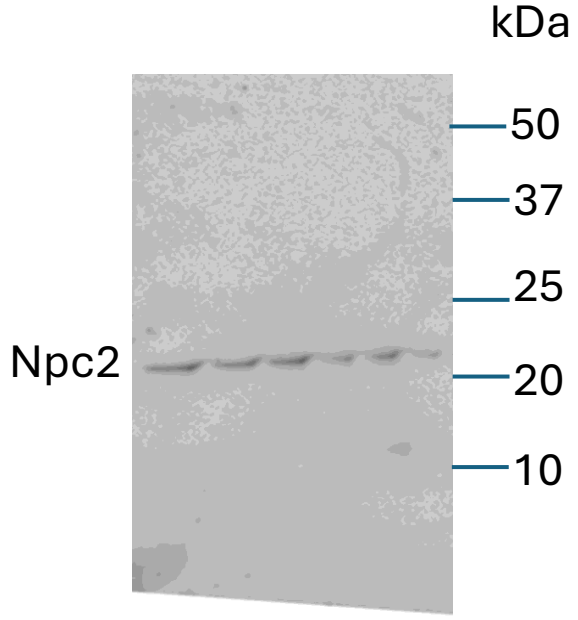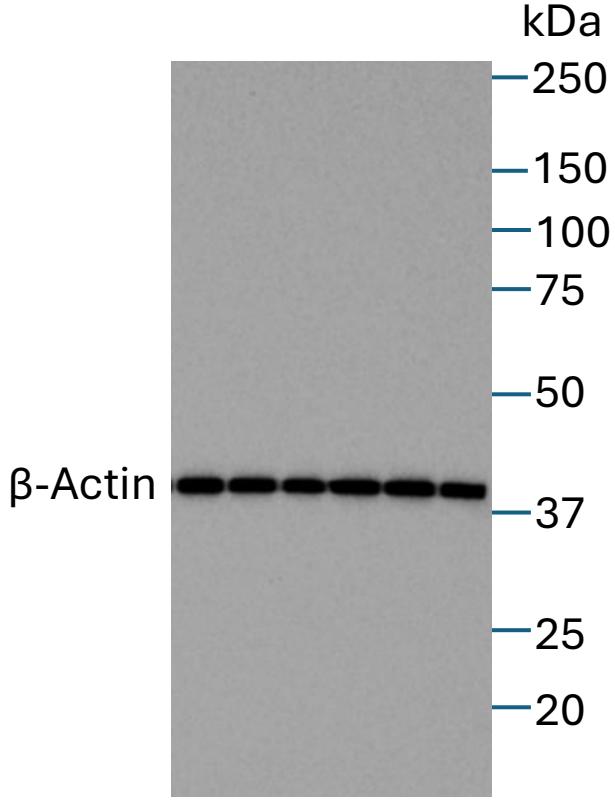

Figure 6G continued

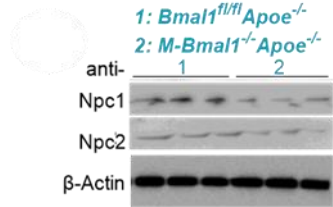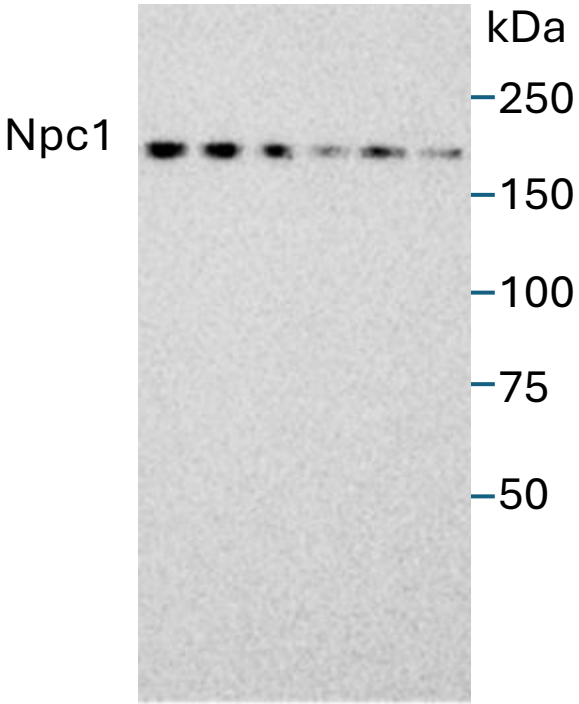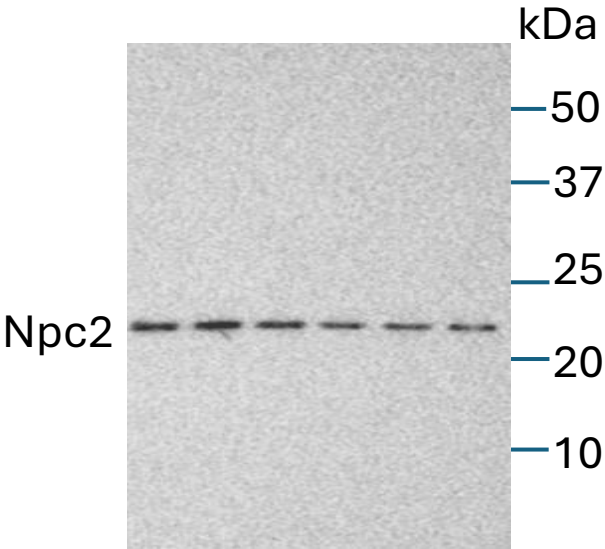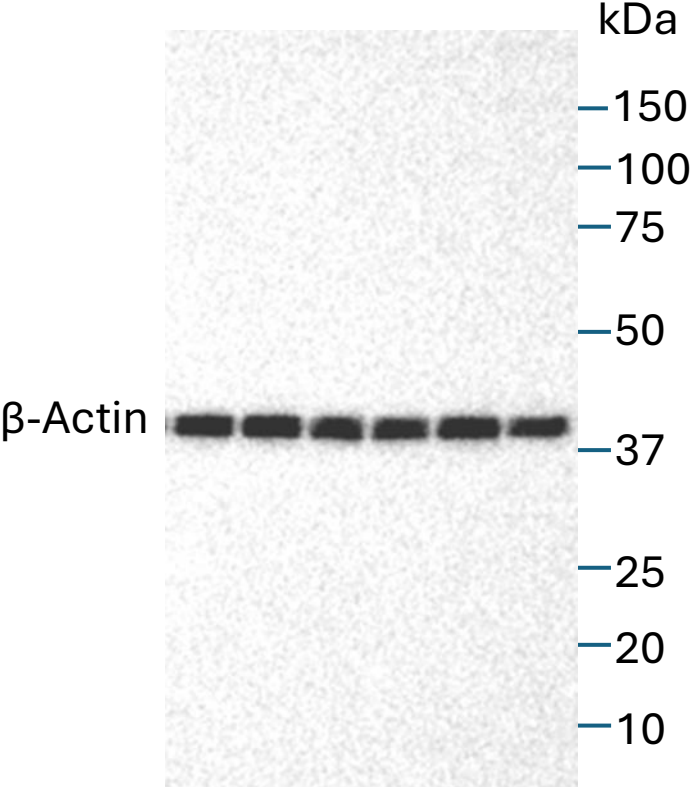

Figure 6H

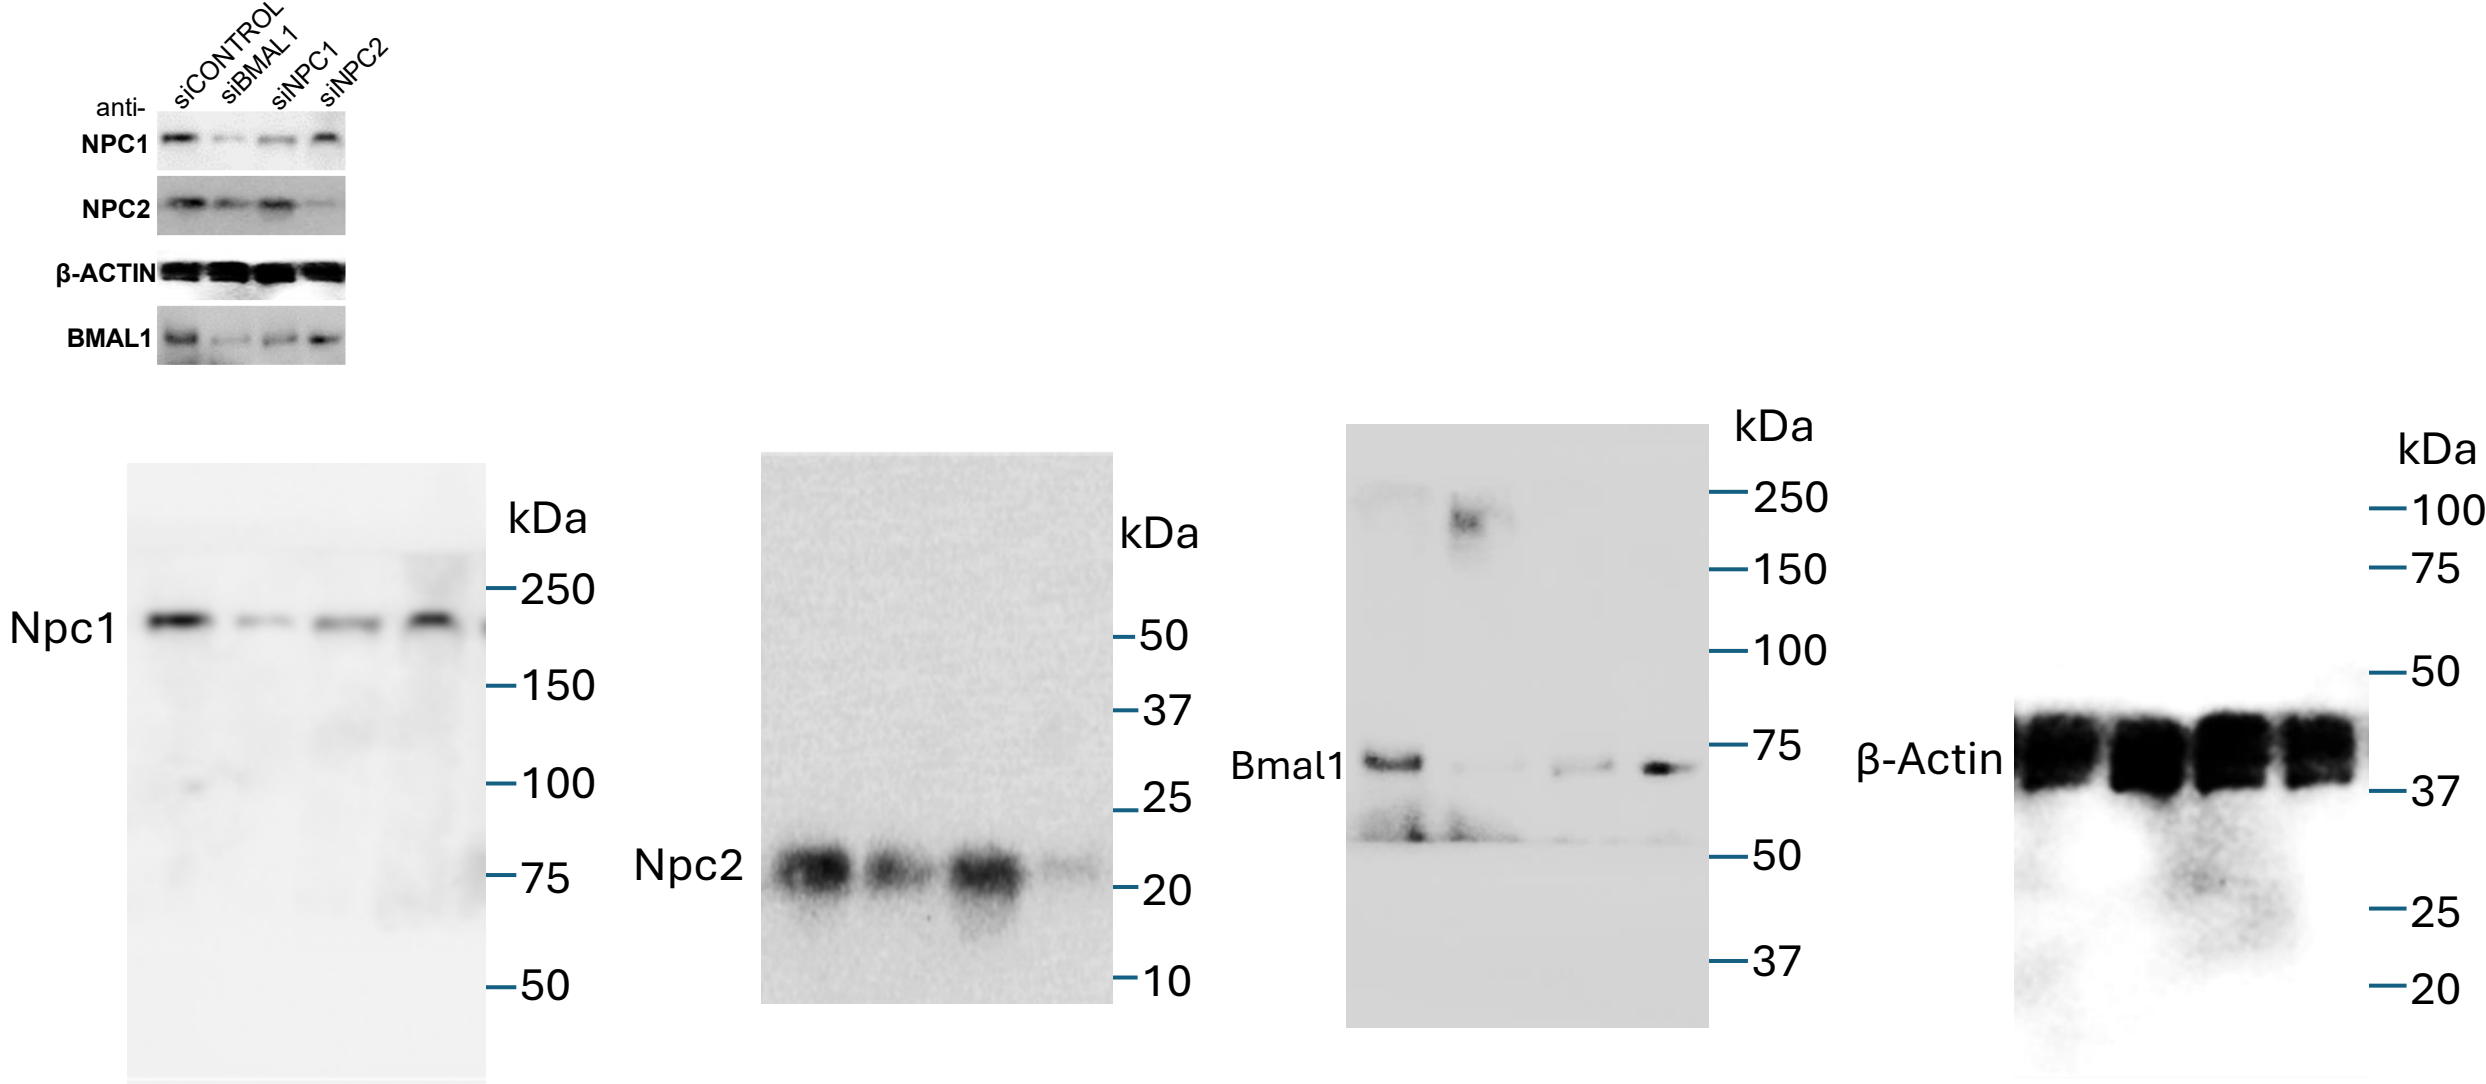

Figure 7B

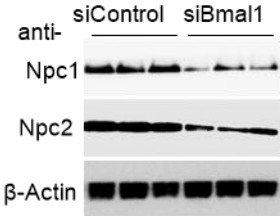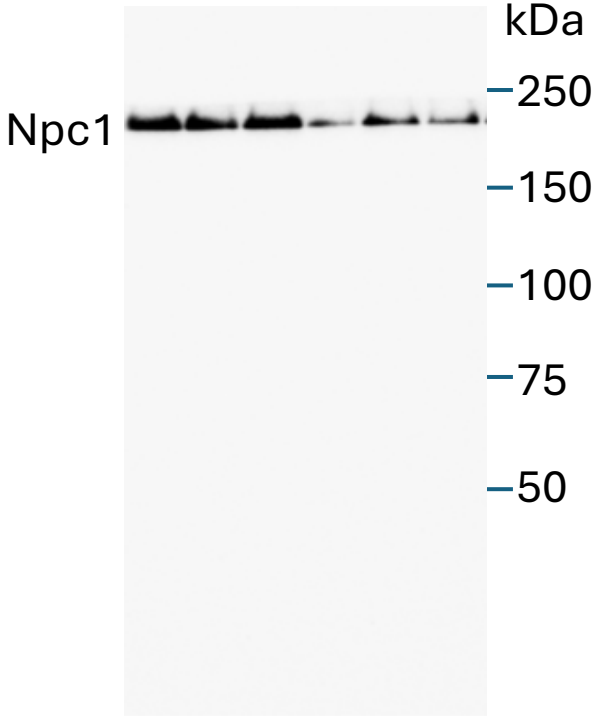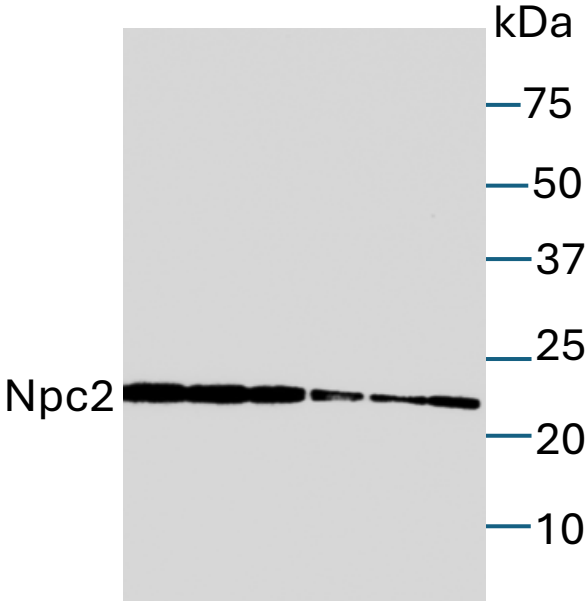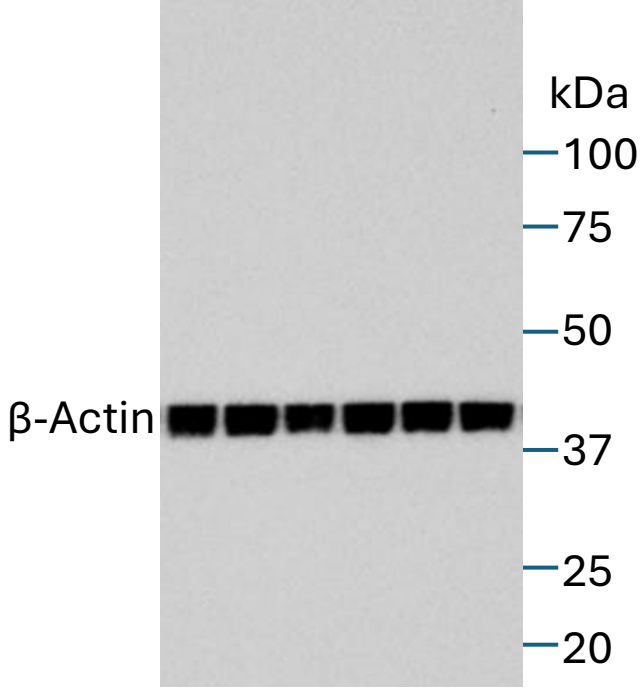

Figure 7D

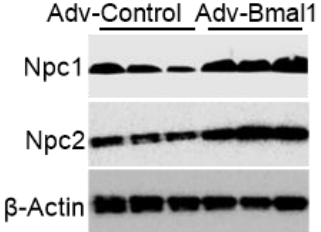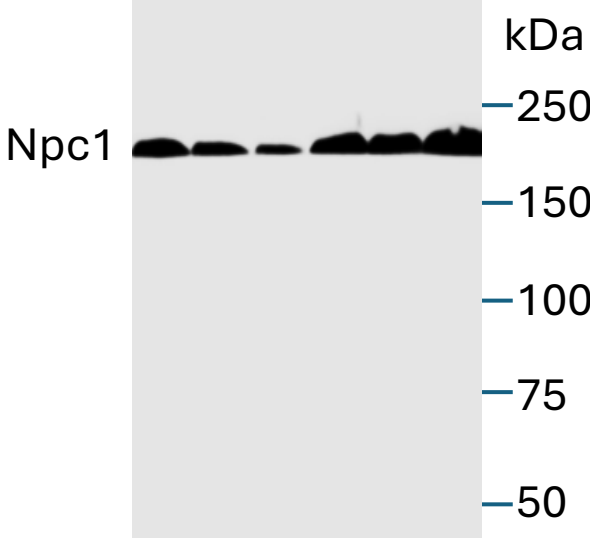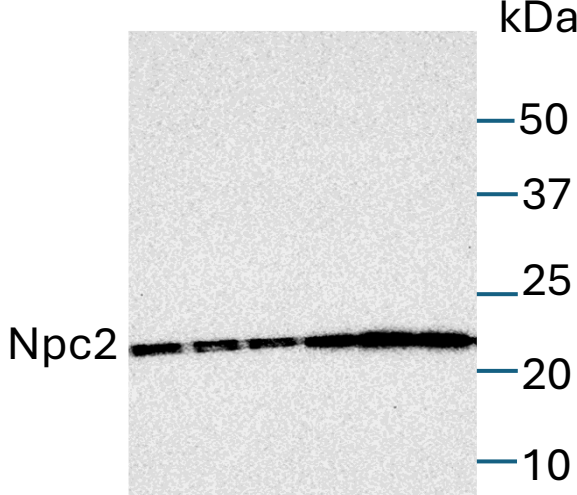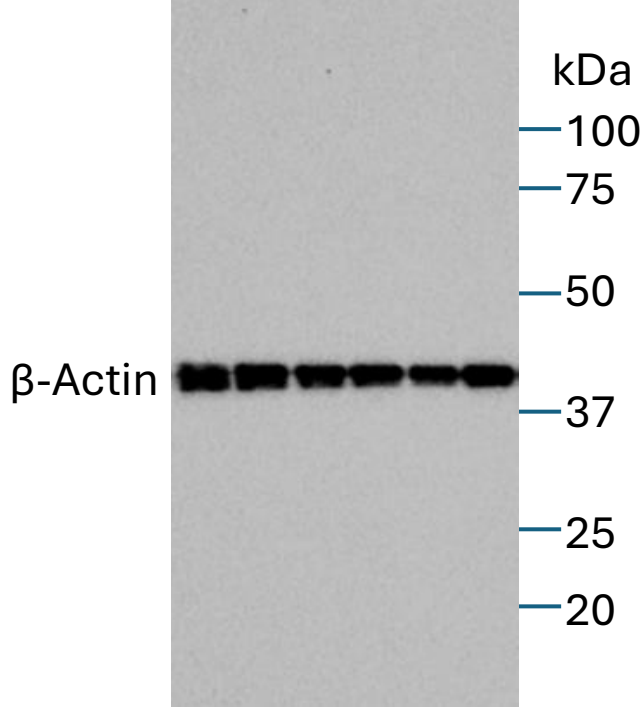

Figure 7G

**G**

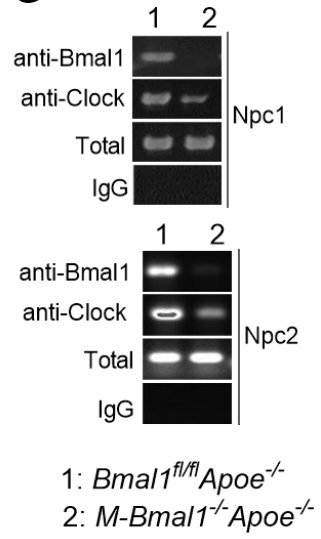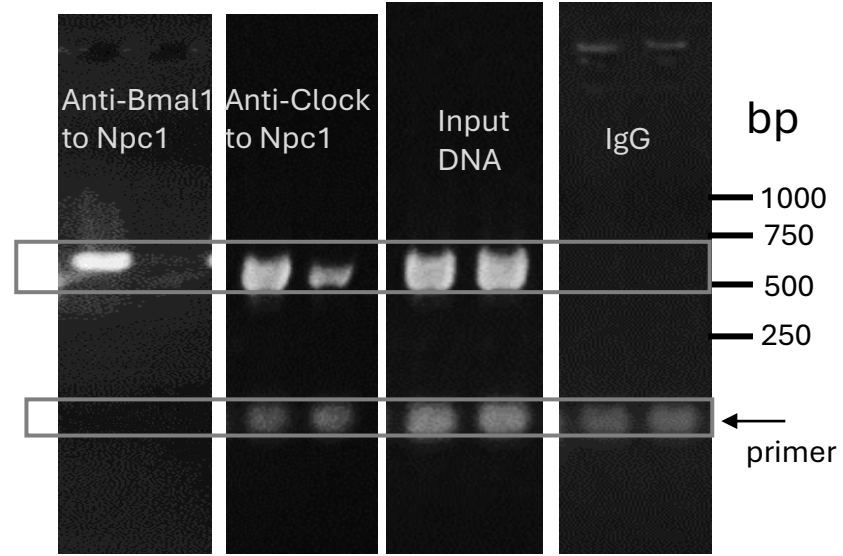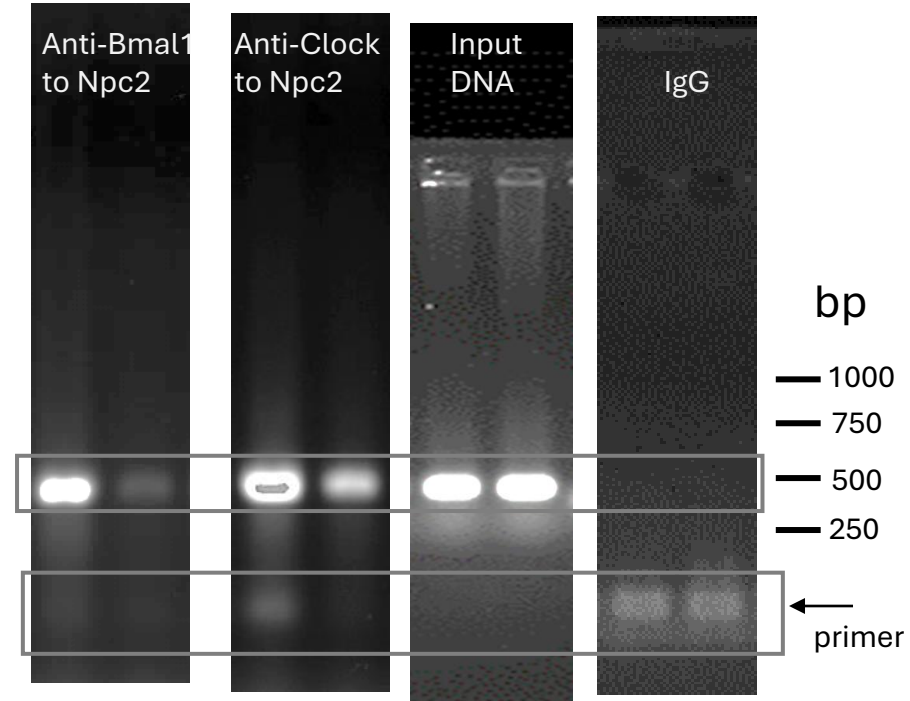

Sup Figure 5E

**E**

1: *Bmal1<sup>fl/fl</sup>Apoe<sup>-/-</sup>*

2: *M-Bmal1<sup>-/-</sup>Apoe<sup>-/-</sup>*

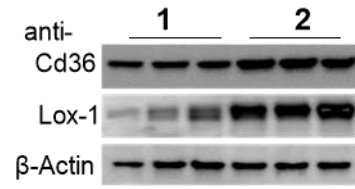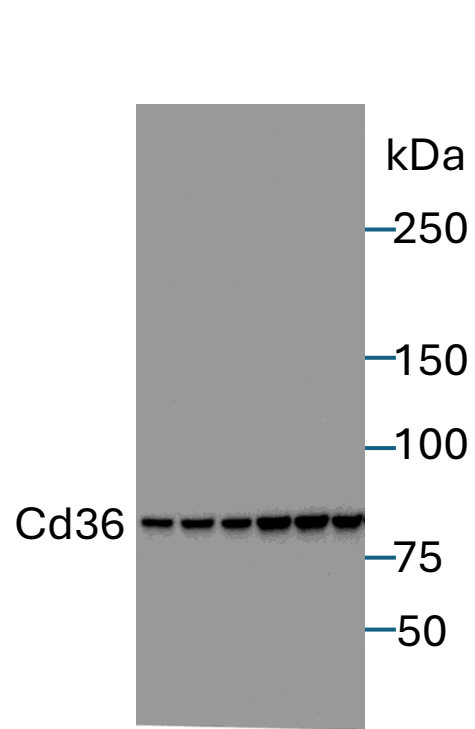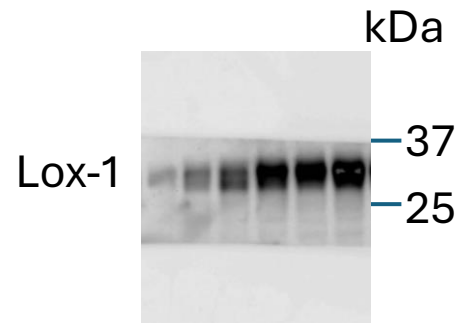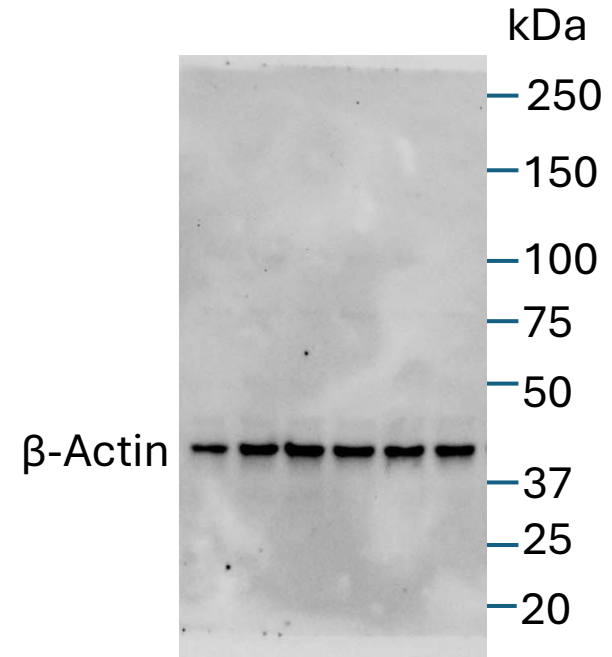

# Sup Figure 5E continued

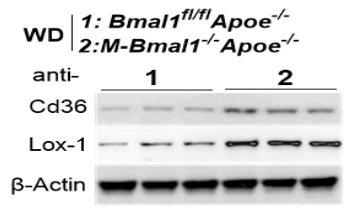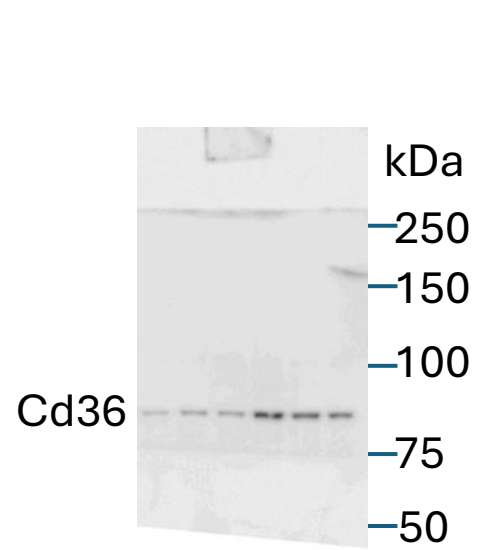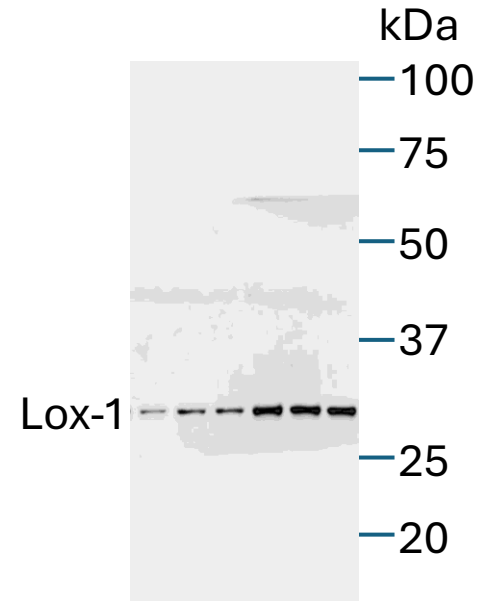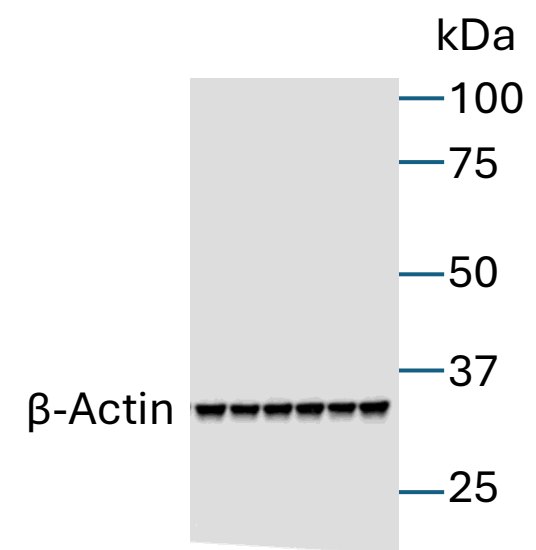

**C**

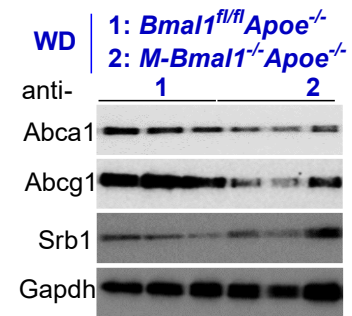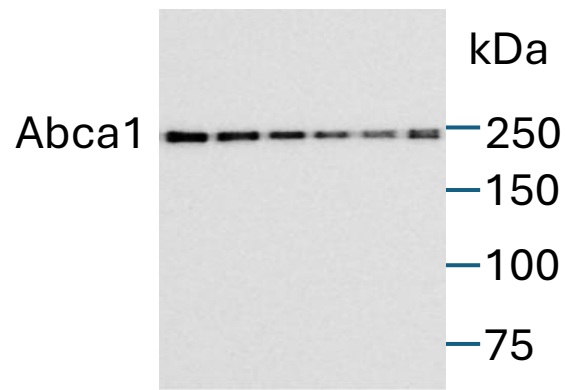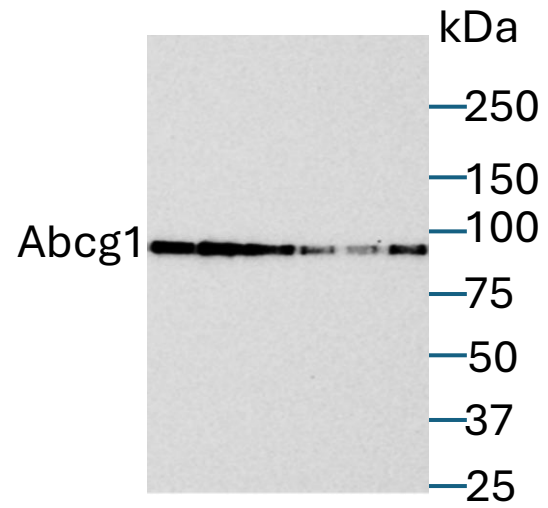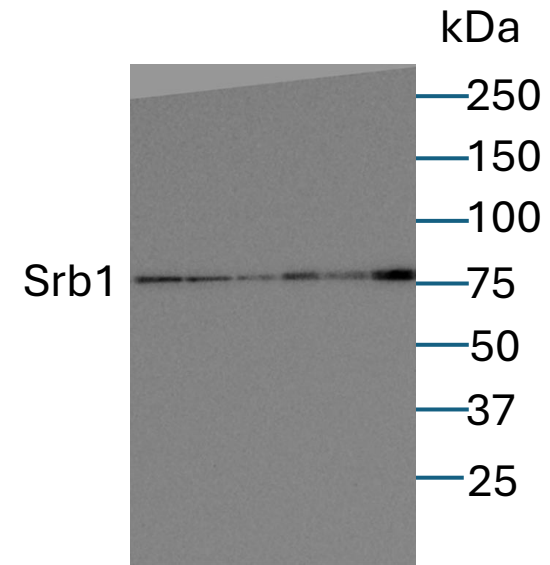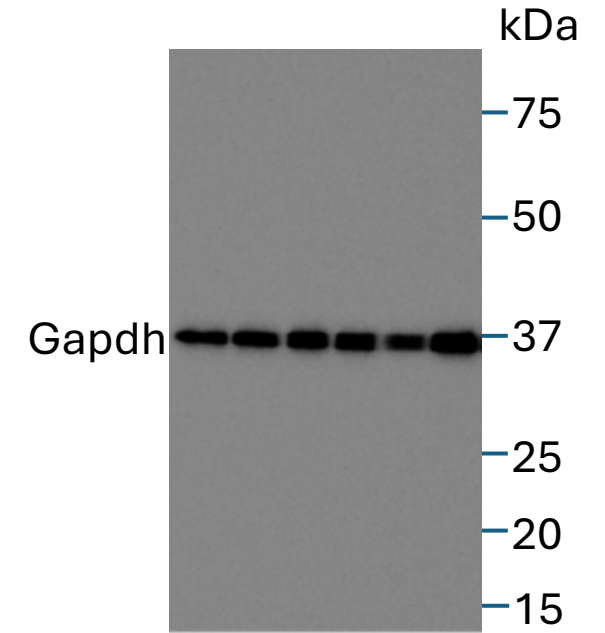

# Sup Figure 9

anti-  
Na, K-ATPase  
Gapdh  
LAMP-1  
ERK1/2  
Calnexin  
Mito Ferritin

1: Plasma membrane (PM)  
2: Cytosol  
3: Lysosomes (Lyso)  
4: Endosomes (Endo)  
5: Endoplasmic reticulum (ER)  
6: Mitochondria (Mito)

Na, K-ATPase

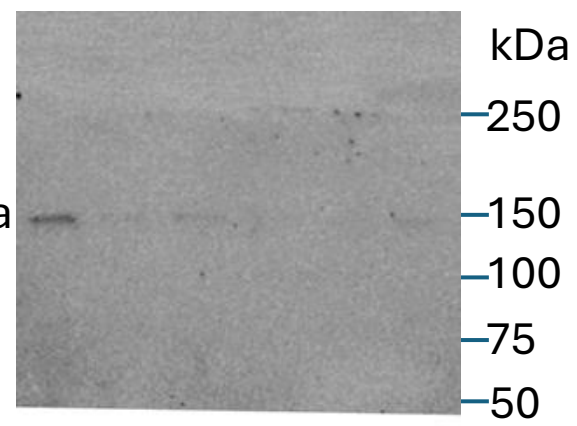

Lamp-1

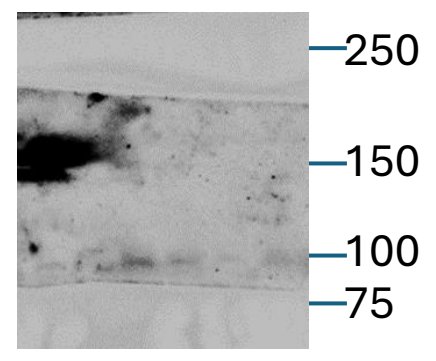

Calnexin

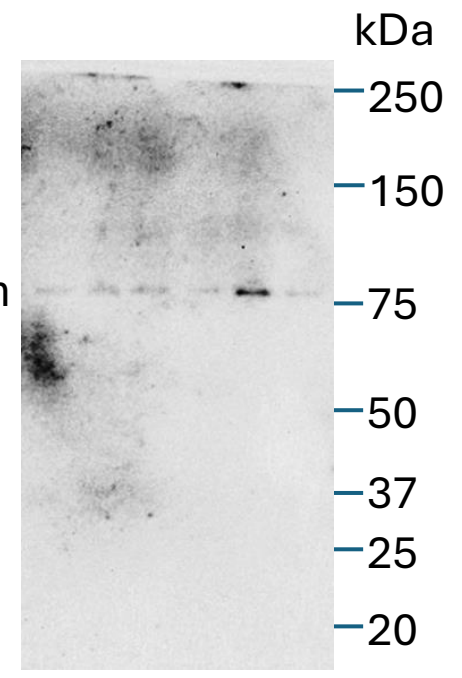

Gapdh

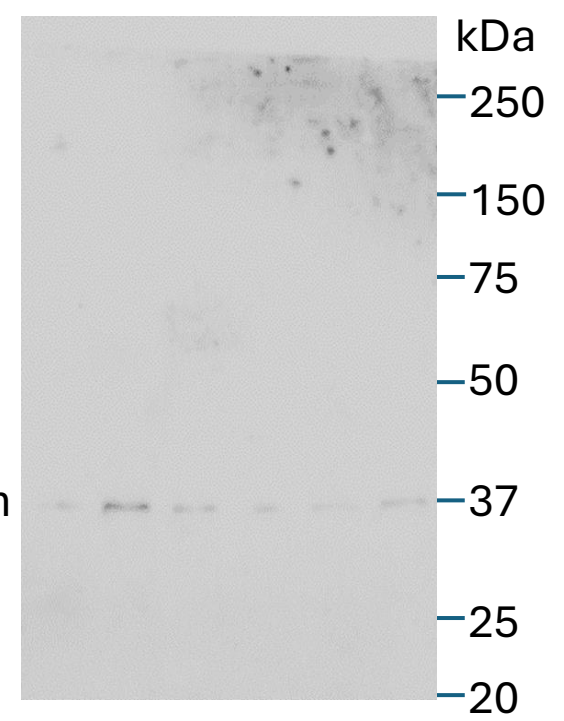

ERK 1/2

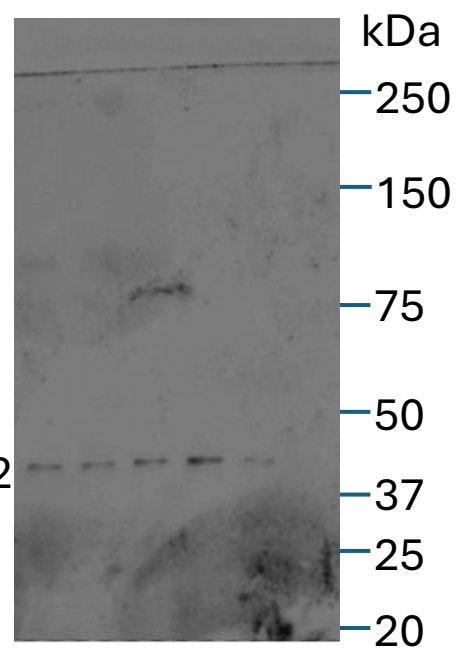

Mito Ferritin

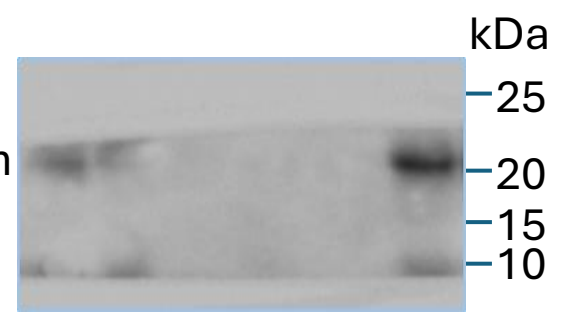

Supplement: sd3 [file 3]
